# Supplementary material
Source: publisher figshare collection journal article supplement (https://aacr.figshare.com/articles/dataset/_/22396664)

# Supplementary Figure 6

## A

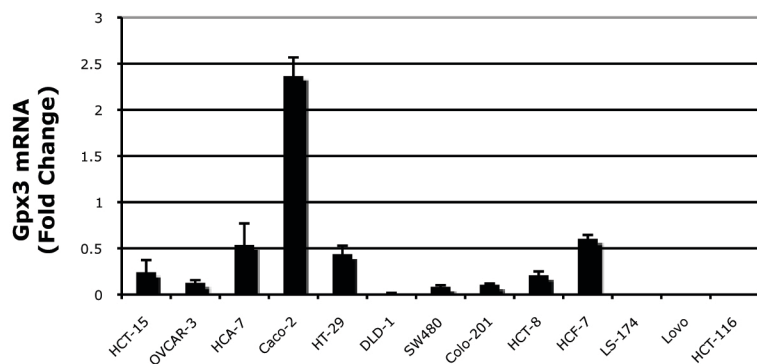

## B

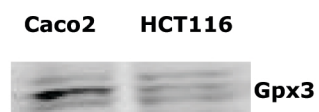

Supplement: Supplementary file 1 [file 39842372]
